# Supplementary material
Source: Springer Nature journal article supplement (https://www.springermedizin.de/resource/supplementary/12936_2004_94_MOESM3_ESM.pdf/9546856)

**A**

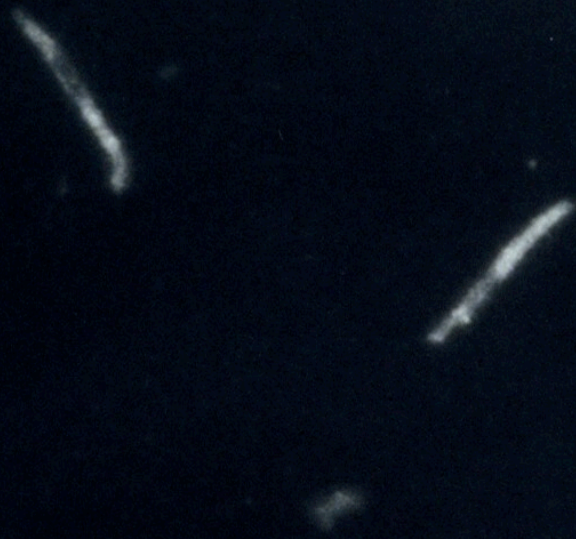

**B**

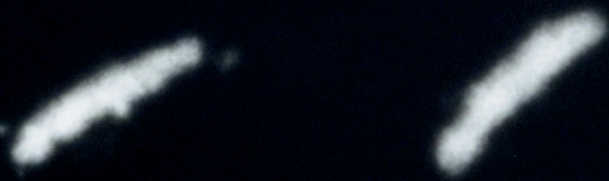

Supplement: MOESM3 [file 9546856]
